# Supplementary material for: Ferroelectricity and magnetism in metal-formate frameworks of [NH4][M(HCOO)3] (M = Sc to Zn): a first-principles study
Source: Royal Society of Chemistry journal article supplement (doi:10.1039/c6ra24182d), 2016-01-01
Supplement: c6ra24182d1.pdf [file c6ra24182d1.pdf]

## Supporting Information

for

### Ferroelectricity and magnetism in metal-formate frameworks of

### $[\text{NH}_4][\text{M}(\text{HCOO})_3]$ (M=Sc to Zn) : A first-principles study

Yingjie Sun,<sup>a</sup> Zhiwen Zhuo<sup>b</sup> and Xiaojun Wu<sup>c</sup>

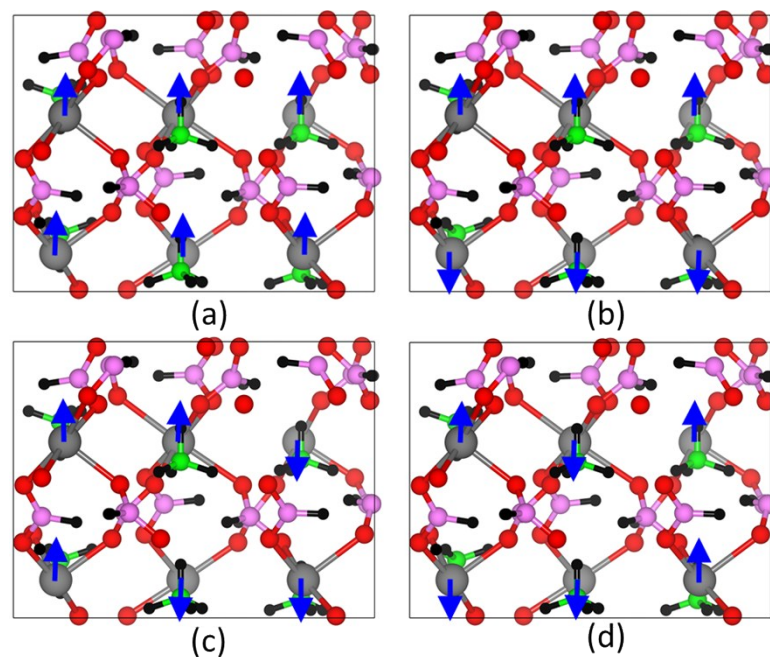

Fig. S1. Magnetic orders in metal-MFFs. (a) Ferromagnetic (FM). (b)-(c) Different antiferromagnetic magnetic orders. (b) AF1, (c) AF2, (d) AF3. Atom scheme: H, black; C, pink; O, red; Zn, gray; N, green.

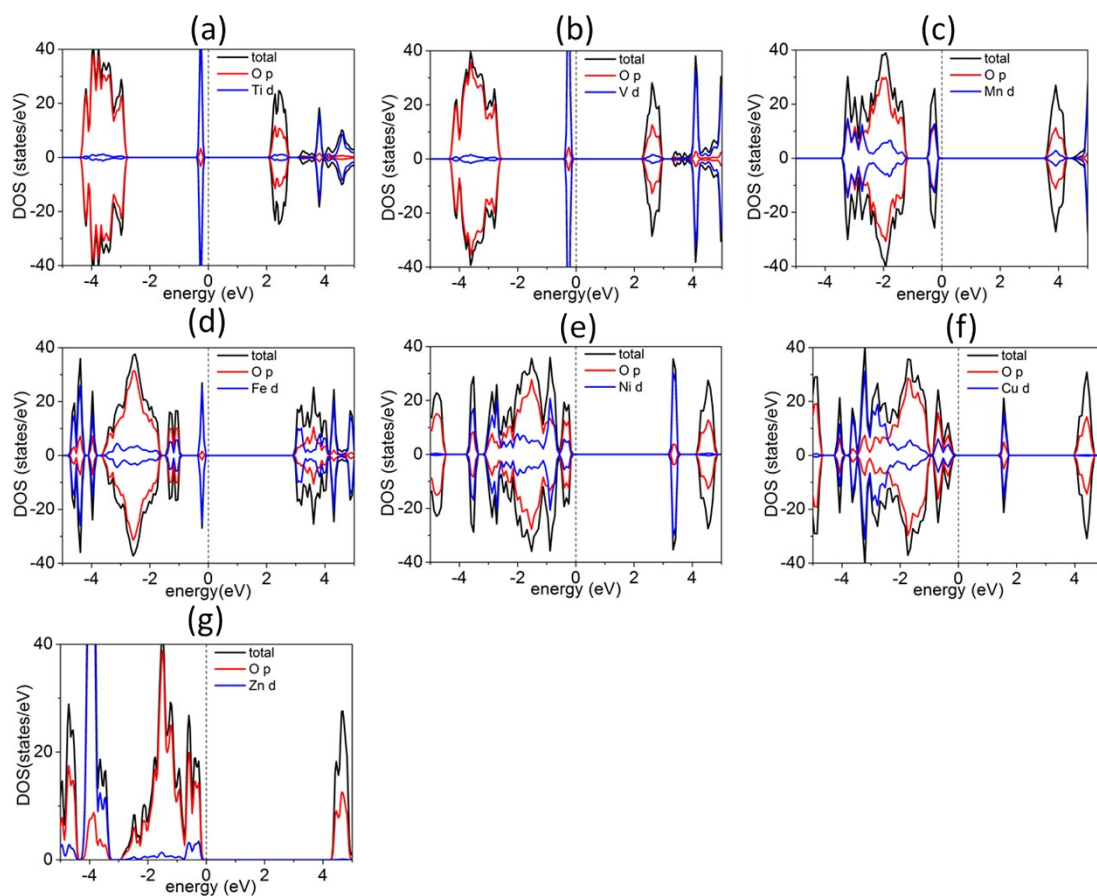

Fig.S2 (a)-(g) Spin-polarized partial density of states (PDOS) for Ti, V, Mn, Fe, Ni, Cu and Zn MFF from top to bottom, respectively.

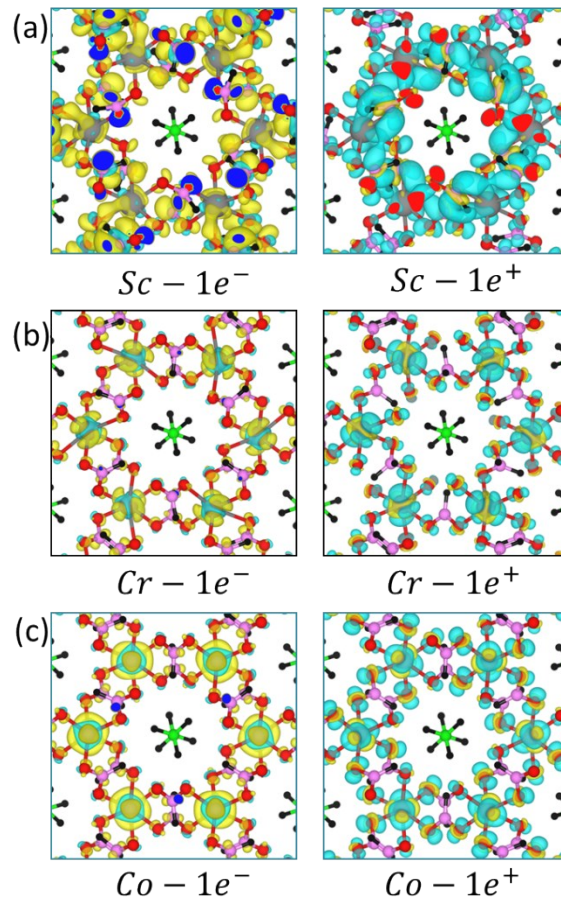

Fig. S3 Deformation density maps of carrier doping Sc-MFF, Cr-MFF and Co-MFF. One electron ( $1e^-$ ) charged(left) and one hole ( $1e^+$ ) charged(right). (a) Isosurface level is  $0.0005 e/\text{\AA}^3$ . (b) and (c) Isosurface level is  $0.001 e/\text{\AA}^3$ . The yellow and green parts correspond to electron density increase and decrease, respectively.
